# Supplementary material for: The Roles of Whole-Genome and Small-Scale Duplications in the Functional Specialization of Saccharomyces cerevisiae Genes
Source: PLoS Genet. 2013 Jan 3;9(1):e1003176. doi: 10.1371/journal.pgen.1003176 (PMC3536658; doi:10.1371/journal.pgen.1003176)
Supplement: Table S1 — Genetic interactions and JTT-corrected amino acid divergence of duplicated genes formed by small-scale duplication (SSD) in Saccharomyces cerevisiae. Divergence refers to the distance from a gene copy to the most recent ancestor of the duplication event. Genes are represented by their locus tag in S. cerevisiae. (XLS) [file pgen.1003176.s001.xls]

## Sheet: Fares_et_al_TableS1.csv
Gene	Divergence	Interactions
YER175C	0.103792	153
YDR395W	0.0366338	322
YBR267W	0.0765631	440
YOR162C	0.189934	118
YBR249C	0.0186313	504
YFL041W	0.0538416	613
YGR003W	0.121631	142
YPR148C	0.116365	134
YGR173W	0.00787955	171
YDR519W	0.104408	165
YOR027W	0.0281332	346
YER075C	0.11867	630
YCR066W	0.140496	535
YNL071W	0.0593255	380
YDR305C	0.118022	194
YDL113C	0.0677998	160
YCR061W	0.134373	138
YKR076W	0.066899	142
YOL141W	0.130968	156
YMR034C	0.0682001	154
YBR271W	0.134317	173
YPL147W	0.0398372	485
YOL039W	0.0192331	619
YGL014W	0.0820809	243
YDR037W	0.0261586	468
YBR105C	0.0888156	688
YHR206W	0.0627298	863
YBR180W	0.0964582	627
YMR080C	0.0208286	315
YDR032C	0.0045864	403
YBL047C	0.0822608	722
YLR251W	0.0447763	529
YGL008C	0.0162035	573
YDR345C	0.192964	158
YDL095W	0.051493	189
YBR015C	0.108854	189
YOL116W	0.0762191	346
YDR457W	0.0448289	500
YPL155C	0.0776859	560
YMR238W	0.0527599	209
YOR026W	0.11673	1118
YGL100W	0.0335848	890
YIL035C	0.0189656	179
YMR297W	0.0290217	145
YBL032W	0.0841239	254
YGR055W	0.0249167	607
YKL188C	0.0728027	537
YHR088W	0.00526647	503
YDR035W	0.0222625	504
YCR059C	0.035399	566
YIL046W	0.0700248	523
YDR171W	0.124331	119
YDR479C	0.108638	689
YGR007W	0.0701433	545
YNL328C	0.00962581	422
YOL055C	0.0682057	171
YHR019C	0.0475663	269
YHR013C	0.0186752	683
YDL125C	0.0166558	165
YLL019C	0.0340473	268
YBR291C	0.0430549	247
YOR113W	0.106747	595
YDR072C	0.136981	689
YDR503C	0.0842105	170
YPL028W	0.00479113	366
YDR258C	0.0351424	212
YLR027C	0.0276613	80
YBR289W	0.0903149	1209
YOR275C	0.12315	972
YBR198C	0.0391264	1069
YHR150W	0.118924	134
YFR048W	0.0682485	159
YGR031W	0.116582	156
YDL145C	0.0389898	530
YOL062C	0.0481798	526
YJL126W	0.0908352	142
YMR008C	0.0505199	181
YDR399W	0.0150079	548
YKL046C	0.0235181	215
YDL185W	0.149445	781
YOL122C	0.0762157	156
YER107C	0.0251889	678
YLR064W	0.0416203	122
YDL078C	0.0434154	139
YMR226C	0.0315765	180
YDR524C	0.169355	210
YPL048W	0.0764429	173
YPR125W	0.0702306	205
YLR178C	0.049166	191
YLR451W	0.0629956	595
YIL159W	0.116963	146
YGL184C	0.0406925	343
YER179W	0.0200646	104
YOL095C	0.100479	851
YOR344C	0.0754479	158
YBL024W	0.0375752	249
YHR028C	0.109625	623
YLR351C	0.0196752	136
YBL008W	0.100948	730
YGL160W	0.116298	582
YDR430C	0.0536656	221
YAL054C	0.024342	119
YFR004W	0.00723431	616
YGR231C	0.0419015	460
YMR266W	0.0988163	176
YGR088W	0.039799	451
YGR040W	0.0109895	549
YNL056W	0.0576764	789
YOR191W	0.157428	232
YHR031C	0.0736934	744
YDL234C	0.0759562	182
YLR208W	0.0142695	588
YML078W	0.00333772	428
YLR361C	0.14829	581
YDR128W	0.0608254	395
YDL177C	0.0918824	149
YOR116C	0.0151931	498
YOL084W	0.11134	160
YIL106W	0.0418116	408
YGR276C	0.0804077	617
YHR032W	0.0981209	157
YBR195C	0.0725559	238
YER176W	0.106533	181
YPL159C	0.151704	613
YGL131C	0.180025	140
YMR172W	0.163735	143
YJR058C	0.0129359	557
YOR337W	0.0692786	150
YPR006C	0.0563674	111
YGR155W	0.0264846	574
YDR283C	0.0396631	528
YDR062W	0.0221719	438
YOL119C	0.0475874	150
YOR005C	0.181306	147
YAL067C	0.0786288	181
YKL211C	0.0554889	503
YJL176C	0.144968	691
YPR114W	0.0693297	192
YBR009C	0	362
YPL247C	0.0709253	185
YJL155C	0.0568162	148
YLL023C	0.0756871	173
YNL169C	0.0358632	764
YER170W	0.0865307	167
YER013W	0.077952	584
YGL125W	0.0336044	232
YKR038C	0.0229448	474
YHR137W	0.0714495	187
YLR405W	0.0946261	167
YGL009C	0.0429382	574
YMR171C	0.0857141	172
YDR284C	0.0904548	113
YKL164C	0.0230056	529
YLR308W	0.1371	585
YBR240C	0.0748382	113
YNL061W	0.0227346	1058
YOL042W	0.0342014	148
YBR263W	0.0232885	531
YER095W	0.0424821	718
YML067C	0.0722451	629
YGR132C	0.0307351	852
YHR007C	0.0249851	836
YFR009W	0.0240189	295
YOR267C	0.0765737	446
YIL042C	0.0597975	100
YKL009W	0.02562	194
YOR032C	0.15927	175
YBR205W	0.073367	603
YIL124W	0.060689	140
YLR216C	0.0314918	273
YJL092W	0.0939076	367
YLR170C	0.0324459	724
YNL067W	0.0375708	291
YKR039W	0.0492565	223
YEL020C	0.0800644	430
YPL060W	0.0502908	182
YPL152W	0.0598649	226
YBR025C	0.0323724	203
YGL163C	0.0427271	743
YDR293C	0.0336899	1105
YCL057W	0.0405465	166
YDR097C	0.0895025	135
YPL184C	0.0706921	245
YGR060W	0.013272	517
YDR492W	0.0323741	574
YER006W	0.03247	576
YBR260C	0.0444176	719
YHR086W	0.113755	162
YHR094C	0.0201917	575
YPR029C	0.0831212	729
YER078C	0.071472	256
YPL270W	0.0660173	637
YPL023C	0.031656	573
YLR367W	-6.06e-05	638
YER125W	0.0130736	549
YDR192C	0.279397	505
YDR382W	0.0456101	929
YKR009C	0.058495	154
YMR272C	0.043148	1036
YOR229W	0.0468557	122
YHR204W	0.145637	146
YFR006W	0.0874194	156
YGL202W	0.0502652	198
YPR178W	0.143299	777
YER073W	0.0476983	556
YDR256C	0.0326437	539
YNL264C	0.0387506	468
YFR030W	0.0608054	157
YDL126C	0.00829214	1082
YNL003C	0.0436039	455
YBR162C	0.0644878	170
YLR044C	0.0116807	581
YDL178W	0.0329808	553
YOR374W	0.018767	600
YBL088C	0.137695	155
YOR067C	0.0332027	770
YEL031W	0.0299387	251
YBR151W	0.0756246	148
YKL191W	0.102478	196
YPL167C	0.14968	506
YBL084C	0.0421145	499
YPR011C	0.0643506	114
YMR078C	0.117534	900
YIL078W	0.0250881	558
YML123C	0.0491313	194
YIL038C	0.0824687	128
YOR286W	0.0497989	125
YDL206W	0.156644	138
YOL082W	0.228353	139
YBR158W	0.10653	183
YMR054W	0.0523314	515
YCL064C	0.0982102	616
YER047C	0.135548	157
YNR033W	0.0945562	606
YPR122W	0.126779	167
YPL074W	0.0965543	142
YIL103W	0.0309124	214
YLL026W	0.0089281	136
YDR191W	0.0694757	597
YGR135W	0.00721976	551
YJR032W	0.0956067	1054
YIL044C	0.103793	781
YNL281W	0.0444998	47
YPL020C	0.137079	439
YPL208W	0.124941	549
YLR144C	0.113368	139
YLR389C	0.0565687	183
YOR061W	0.00185603	332
YOR070C	0.0347504	988
YNL024C	0.0767367	131
YLR397C	0.0431294	429
YOR348C	0.0504802	527
YJR005W	0.0514089	818
YHL036W	0.0599047	156
YJL089W	0.137848	476
YGR202C	0.0567936	158
YML117W	0.126464	203
YDR297W	0.039156	256
YHR129C	0.0462527	1037
YDL225W	0.0589573	503
YER065C	0.0199512	267
YBR245C	0.0375779	285
YLR383W	0.047481	411
YJL062W	0.078135	883
YPL265W	0.0472393	216
YOR219C	0.127102	142
YER056C	0.0406542	208
YHR178W	0.0531133	420
YDR214W	0.0833634	512
YML050W	0.134703	142
YJR077C	0.018604	252
YLR209C	0.0416093	136
YGL058W	-0.00248881	721
YEL061C	0.0645719	283
YNL290W	0.0270045	530
YHR166C	0.0416214	510
YDL007W	0.00225244	607
YGR203W	0.0548587	166
YFL008W	0.0589331	884
YBR010W	0	513
YPR037C	0.0593758	188
YOR244W	0.0321938	420
YMR015C	0.0233854	343
YDR155C	0.0125007	162
YBR112C	0.108091	162
YBL052C	0.199324	143
YDR420W	0.386569	524
YER086W	0.0171102	1145
YNL135C	0.00440531	288
YLR343W	0.134896	120
YDR244W	0.109905	762
YBR283C	0.0312672	277
YNL330C	0.0089679	810
YBR207W	0.0829165	151
YGR170W	0.0987816	656
YPR069C	0.0138417	415
YNL064C	0.0246512	401
YKL135C	0.0585791	167
YGL095C	0.0558935	640
YKL120W	0.0227988	142
YAL036C	0.00870068	178
YHR050W	0.054719	187
YLR014C	0.123154	191
YGL003C	0.0338028	645
YPL195W	0.0878291	637
YNL101W	0.0655758	148
YGR015C	0.105784	155
YDR287W	0.0640836	553
YJL130C	0.0212433	211
YPL259C	0.0320309	187
YOR039W	0.0241609	973
YMR101C	0.0975888	129
YDR135C	0.0488828	143
YNL032W	0.0776656	169
YBR160W	0.00292334	515
YJL183W	0.0769003	902
YPR041W	0.0118843	349
YNR027W	0.0821667	151
YLR130C	0.0811992	563
YJL074C	0.0526803	774
YJL186W	0.0938198	139
YGR059W	0.127478	574
YKL106W	0.0701028	194
YBR281C	0.04793	121
YBR109C	0	520
YMR085W	0.206972	167
YLL001W	0.0206401	391
YLR213C	0.0946782	485
YFL039C	0	2154
YJL095W	0.0655061	689
YLL028W	0.0411004	173
YHL014C	0.062698	93
YMR022W	0.00609764	683
YJL149W	0.0605228	179
YGL059W	0.0433099	177
YJR133W	0.0613012	155
YLR268W	0.014219	1048
YMR169C	0.0551201	175
YLR387C	0.0825919	539
YGR012W	0.0667255	478
YOL018C	0.070451	885
YEL040W	0.0999002	515
YGR014W	0.281695	176
YLR017W	0.0321704	239
YDL216C	0.146616	686
YIL153W	0.0555945	295
YLR098C	0.0408061	563
YER048C	0.0336418	239
YLR321C	0.0504575	470
YOR270C	0.0234188	400
YLR058C	0.00948015	479
YDR148C	0.0681293	782
YIL130W	0.080402	130
YGL150C	0.0690595	463
YBL066C	0.091679	190
YAL012W	0.0139659	535
YOL002C	0.022231	130
YKL146W	0.0909381	525
YKR067W	0.0558106	626
YDL114W	0.172456	192
YLR153C	0.0194054	462
YLR008C	0.048464	511
YIL107C	0.0565277	185
YMR205C	0.0125659	381
YKL002W	0.0329832	741
YBR212W	0.117031	149
YOR291W	0.0541305	648
YLR237W	0.0566759	215
YPR117W	0.0939938	136
YLR024C	0.116854	954
YMR215W	0.0701358	155
YJL172W	0.0490718	184
YPR031W	0.124129	234
YGL019W	0.0601724	829
YJR095W	0.0235415	632
YMR035W	0.0674504	257
YJL168C	0.0738413	477
YDR197W	0.110971	476
YGR086C	0.00954514	638
YKL004W	0.0224061	614
YMR088C	0.0292289	154
YDR292C	0.067643	664
YJL103C	0.139792	123
YMR253C	0.0721772	141
YIL041W	0.0239532	622
YDL001W	0.027486	704
YOR290C	0.0870411	67
YBR139W	0.0700295	173
YOR310C	0.0128225	374
YOR273C	0.0895694	469
YLR398C	0.0504051	276
YPL100W	0.07726	728
YPL227C	0.0438734	728
YFR044C	0.0354665	168
YFL049W	0.12074	217
YHR194W	0.0405878	814
YDR245W	0.0608036	412
YLR107W	0.0791951	120
YOL054W	0.120958	600
YOL027C	0.0706169	308
YMR280C	0.112315	205
YGR029W	0.104799	430
YGR233C	0.0707734	152
YPR179C	0.0982595	907
YBR084W	0.0429942	249
YKL085W	0.0238196	263
YCR092C	0.11817	184
YGL173C	0.055537	1251
YER017C	0.0646065	541
YPR151C	0.0590171	590
YPL217C	0.0600232	756
YGL194C	0.040298	751
YBR114W	0.0444003	139
YLR246W	0.0607463	599
YKL113C	0.0195769	1017
YER172C	0.102337	444
YOR334W	0.0522763	187
YJL171C	0.07213	243
YAL042W	0.0492295	644
YKL087C	0.0656991	341
YNR012W	0.0426934	146
YDR394W	0.00546071	122
YNR006W	0.110366	949
YER155C	0.0951013	715
YLL043W	0.0599534	938
YER110C	0.0164677	62
YER005W	0.0916947	558
YGL137W	0.0440646	177
YLR454W	0.108299	457
YER111C	0.0840993	580
YOR002W	0.0322846	274
YML070W	0.0309013	604
YNL037C	0.0165274	722
YPL008W	0.1081	756
YDR190C	0.0153521	548
YKL190W	0.0215502	282
YJR116W	0.0793931	140
YDR109C	0.180276	128
YMR307W	0.070528	1166
YBR073W	0.0914642	545
YJR131W	0.123818	152
YLR432W	0.0693114	607
YDR435C	0.0915493	657
YLR004C	0.0279253	561
YOL021C	0.0264138	466
YOR285W	0.132518	467
YLR253W	0.0425839	84
YNL147W	0.0729637	412
YNL231C	0.0375425	453
YML099C	0.0881844	169
YBR286W	0.0517391	182
YJL159W	0.0370119	198
YMR246W	0.0910579	140
YEL036C	0.030641	1089
YKL081W	0.112906	468
YGL077C	0.0505302	523
YIL160C	0.0562178	294
YBL011W	0.0683804	204
YFR021W	0.0396187	203
YMR308C	0.0163824	477
YML121W	0.0167467	376
YOR292C	0.0911673	187
YKL103C	0.0925068	522
YLR146C	0.074171	128
YHR046C	0.0681638	515
YHL039W	0.0867021	170
YAL021C	0.0513409	367
YDR189W	0.0318678	495
YNL111C	0.0715504	694
YNL077W	0.0964179	200
YDR415C	0.10807	141
YCR036W	0.118895	186
YHR113W	0.0472436	186
YDR294C	0.0683236	138
YNL030W	0	197
YPL004C	0.0322549	451
YKR099W	0.0976483	360
YLR047C	0.0895404	188
YDR126W	0.0861369	868
YOR036W	0.0701125	869
YPL109C	0.0706683	661
YNL031C	0	604
YEL027W	0	610
YDL056W	0.0735861	224
YOR025W	0.0874466	905
YLR438W	0.0212812	126
YGR177C	0.15277	190
YBR233W	0.0982545	158
YJR075W	0.0518656	951
YBR244W	0.0754219	627
YOR208W	0.130298	132
YKL041W	0.0340689	321
YDR338C	0.0427975	129
YMR058W	0.0487713	276
YDR131C	0.143066	529
YLR188W	0.0602009	628
YIL120W	0.113116	569
